# Supplementary material for: Viral Genomic Characterization and Replication Pattern of Human Polyomaviruses in Kidney Transplant Recipients
Source: PubMed Central journal article supplement (PMC7696855; doi:10.3390/v12111280), 2020-11-09
Supplement: viruses-12-01280-s001.pdf [file viruses-12-01280-s001.pdf]

**Table S1.** Primer sequences for HPyVs nested PCR

|                  | Region            | Primers                        | Position  | Sequence                           | Fragment length |
|------------------|-------------------|--------------------------------|-----------|------------------------------------|-----------------|
| JCV*             | NCCR <sup>Δ</sup> | JRE-1                          | 4989-5009 | 5'-CCTCCCTATTCAGCACTTTGT-3'        | 678 bp          |
|                  |                   | LP-2                           | 518-537   | 5'-TGCGGCACCCATGAACCTGA-3'         |                 |
|                  |                   | RFOR                           | 5085-5104 | 5'-GCCTCCACGCCCTTACTACT-3'         | 353 bp          |
|                  |                   | RREV                           | 291-310   | 5'-CAGAAGCCTTACGTGACAGC-3'         |                 |
|                  | VP1 <sup>β</sup>  | VP1-1                          | 1569-1592 | 5'-TTGACTCAATTACAGAGGTAGAAT-3'     | 796 bp          |
|                  |                   | VP1-4a                         | 2330-2353 | 5'-AGAAATTGGGTAGGGGTTTTTAAC-3'     |                 |
|                  |                   | JLP-16                         | 1902-1924 | 5'-TAAAGCCTCCCCCACAACAGAAA-3'      | 357 bp          |
| BKV <sup>°</sup> | NCCR <sup>π</sup> | BKTT1                          | 5106-5134 | 5'-AAGGTCCATGAGCTCCATGGATTCTTCC-3' | 694 bp          |
|                  |                   | BKTT2                          | 630-657   | 5'-CTAGGCCCCCAAAAGTGCTAGAGCAGC-3'  |                 |
|                  |                   | BR-P1                          | 82-101    | 5'-TTGAGAGAAAGGGTGGAGGC-3'         | 276 bp          |
|                  |                   | BR-P2                          | 339-358   | 5'-GCCAAGATTCTAGGCTCGC-3'          |                 |
|                  | VP1 <sup>ν</sup>  | VP1-7                          | 1480-1500 | 5'-ATCAAAGAAGTCTCCTCAAT-3'         | 537 bp          |
|                  |                   | VP1-2R                         | 2038-2059 | 5'-GCACTCCCTGCATTTCCAAGGG-3'       |                 |
|                  |                   | 327-1                          | 1630-1649 | 5'-CAAGTGCCAAAATACTAAT-3'          | 327 bp          |
| 327-2            | 1956-1937         | 5'-TGCATGAAGGTTAAGCATGC-3'     |           |                                    |                 |
| MCV <sup>#</sup> | NCCR <sup>Σ</sup> | ORIF1                          | 4832-4853 | 5'-AGAGAGCCTATACCACTAACAG-3'       | 502 bp          |
|                  |                   | ORIR1                          | 5314-5334 | 5'-ACATGATTGAACTTTTATTGC-3'        |                 |
|                  |                   | ORIF2                          | 5077-5100 | 5'-AATTTACCAATATTGGCCAGCAG-3'      | 203 bp          |
|                  |                   | ORIR2                          | 5261-5280 | 5'-GAGGCGGAGTTTGACTGAT-3'          |                 |
|                  | VP1 <sup>α</sup>  | VP1 FwE                        | 3174-3193 | 5'-GGCTTTCTTTTGAGAGGCCT-3'         | 440 bp          |
|                  |                   | VP1 RevE                       | 3613-3592 | 5'-TCCTTTGCATAGAGGGCCCACT-3'       |                 |
|                  |                   | VP1 FwI                        | 3276-3297 | 5'-TTGGGTAAACAGTTTTCTCCTG-3'       | 240 bp          |
| VP1 RevI         | 3515-3493         | 5'-AGTAACATTAATAATATCTAGGCA-3' |           |                                    |                 |

\*Reference Mad1 strain

<sup>°</sup>Reference Dunlop strain

<sup>#</sup>Reference strain EU375803

<sup>Δ</sup>Reference [30]

<sup>β</sup>Reference [14,31]

<sup>π</sup>Reference [32,33]

<sup>ν</sup>Reference [34]

<sup>Σ</sup>Reference [35]

<sup>α</sup>Reference [36]

**Table S2.** Thermal profiles for NCCR HPyVs nested PCR

|                             | <b>Denaturation<br/>(time)</b> | <b>Annealing<br/>(time)</b> | <b>Extension<br/>(time)</b> | <b>Number<br/>of cycles</b> |
|-----------------------------|--------------------------------|-----------------------------|-----------------------------|-----------------------------|
| <b>Outer/Inner reaction</b> |                                |                             |                             |                             |
| 95°C for 5'                 |                                |                             |                             |                             |
| <b>JCPyV</b>                |                                | 59°C/63°C<br>(30'')         |                             | 35                          |
| <b>BKPyV</b>                | 95°C<br>(30'')                 | 60°C/63°C<br>(30'')         | 72°C<br>(30'')              | 30                          |
| <b>MCPyV</b>                |                                | 54°C/58°C<br>(30'')         |                             | 35/30                       |
| 72°C for 5'                 |                                |                             |                             |                             |

**Table S3.** Thermal profiles for VP1 HPyVs nested PCR

|                             | <b>Denaturation<br/>(time)</b> | <b>Annealing<br/>(time)</b> | <b>Extension<br/>(time)</b> | <b>Number<br/>of cycles</b> |
|-----------------------------|--------------------------------|-----------------------------|-----------------------------|-----------------------------|
| <b>Outer/Inner reaction</b> |                                |                             |                             |                             |
| 95°C for 5'                 |                                |                             |                             |                             |
| <b>JCPyV</b>                |                                | 63°C/66°C<br>(30'')         |                             | 30                          |
| <b>BKPyV</b>                | 95°C<br>(30'')                 | 60°C/58°C<br>(30'')         | 72°C<br>(30'')              | 30                          |
| <b>MCPyV</b>                |                                | 58°C/54°C<br>(30'')         |                             | 30                          |
| 72°C for 5'                 |                                |                             |                             |                             |

**Figure S1.** Sequence of the JCPyV Viral protein 1 (VP1) gene amplified from urine samples (nucleotide 1710-1924; ACCESSION NC\_001699)

**JCPyV**

|         |                                |                                                        |                                    |                 |                               |                                     |              |
|---------|--------------------------------|--------------------------------------------------------|------------------------------------|-----------------|-------------------------------|-------------------------------------|--------------|
|         |                                |                                                        |                                    |                 | (1771)                        |                                     | (1786)(1790) |
| Type 1a | acagtg                         | ggccagaattccactacccaatctaaatgaggatctaacctgtggaaatatact | catgtgggaggctgtg                   | gacct           | t                             | taaaaaactgagg                       |              |
| Type 1b | acagtg                         | ggccagaattccactacccaatctaaatgaggatctaacctgtggaaatatact | catgtgggaggctgtg                   | gacct           | t                             | taaaaaactgagg                       |              |
| Type 2a | acagtg                         | ggccagaattccactacccaatctaaatgaggatctaacctgtggaaatatact | <b>A</b> atgtgggaggctgtg           | <b>K</b> acct   | t                             | taaaaaactgagg                       |              |
| Type 2c | acagtg                         | ggccagaattccactacccaatctaaatgaggatctaacctgtggaaatatact | <b>A</b> atgtgggaggctgtg           | <b>T</b> acct   | t                             | taaaaaactgagg                       |              |
| Type 4  | acagtg                         | ggccagaattccactacccaatctaaatgaggatctaacctgtggaaatatact | catgtgggaggctgtg                   | gacct           | t                             | taaaaaactgagg                       |              |
| Type 6  | acagtg                         | ggccagaattccactacccaatctaaatgaggatctaacctgtggaaatatact | <b>A</b> atgtgggaggctgtg           | gacc            | <b>C</b>                      | taaaaaactgagg                       |              |
|         |                                | (1813) (1818)                                          |                                    | (1843)          | (1850)                        |                                     | (1869-1870)  |
| Type 1a | ttataggggtg                    | gacaag                                                 | tttgatgaatgtgcactctaattggg         | caagca          | actcatgacaatggtgcaggg         | gaagccagtgcagggcaccagctttc          |              |
| Type 1b | ttataggggtg                    | gacaag                                                 | tttgatgaatgtgcactctaattgg          | <b>T</b> caagca | <b>G</b> ctcatgacaatggtgcaggg | gaagccagtgcagggcaccagctttc          |              |
| Type 2a | ttataggggtg                    | <b>R</b> acaa                                          | <b>C</b> tttgatgaatgtgcactctaattgg | <b>T</b> caagca | actcatgacaatggtgcaggg         | <b>A</b> aagccagtgcagggcaccagctttc  |              |
| Type 2c | ttataggggtg                    | gacaa                                                  | <b>C</b> tttgatgaatgtgcactctaattgg | <b>T</b> caagca | <b>G</b> ctcatgacaatggtgcaggg | <b>A</b> aagccagtgcagggcaccagctttc  |              |
| Type 4  | ttataggggtg                    | gacaa                                                  | <b>C</b> tttgatgaatgtgcactctaattgg | caagca          | actcatgacaatggtgcaggg         | <b>CA</b> aagccagtgcagggcaccagctttc |              |
| Type 6  | ttataggggtg                    | gacaa                                                  | <b>C</b> tttgatgaatgtgcactctaattgg | <b>T</b> caagca | actcatgacaatggtgcaggg         | gaagccagtgcagggcaccagctttc          |              |
| Type 1a | atTTTTTTTTctgTTGGGGGGgaggcttta |                                                        |                                    |                 |                               |                                     |              |
| Type 1b | atTTTTTTTTctgTTGGGGGGgaggcttta |                                                        |                                    |                 |                               |                                     |              |
| Type 2a | atTTTTTTTTctgTTGGGGGGgaggcttta |                                                        |                                    |                 |                               |                                     |              |
| Type 2c | atTTTTTTTTctgTTGGGGGGgaggcttta |                                                        |                                    |                 |                               |                                     |              |
| Type 4  | atTTTTTTTTctgTTGGGGGGgaggcttta |                                                        |                                    |                 |                               |                                     |              |
| Type 6  | atTTTTTTTTctgTTGGGGGGgaggcttta |                                                        |                                    |                 |                               |                                     |              |

K=G or T; R=A or G

**Figure S2.** Sequence of the BKPyV Viral protein 1 (VP1) gene amplified from urine samples (nucleotide 1681-1958; ACCESSION V01108 J02038)

**BKPyV**

(1687) (1698)

Type Ia actggg**G**tagatgctat**T**acagaggtagaatgcttcctaaaccagaaatgggggatccagatgaaaaccttaggggctttagtctaaagcta

Type Ib-1 actggg**G**tagatgctat**A**acagaggtagaatgcttcctaaaccagaaatgggggatccagatgaaaaccttaggggctttagtctaaagcta

Type Ib-2 actggg**C**tagatgctat**A**acagaggtagaatgcttcctaaaccagaaatgggggatccagatgaaaaccttaggggctttagtctaaagcta

(1809) (1860)

Type Ia agtgctgaaaatgactttagcagtgatagcccaga**G**agaaaaatgcttcctggttacagcacagcaagaattcccctcccgaattt**A**aatgag

Type Ib-1 agtgctgaaaatgactttagcagtgatagcccaga**A**agaaaaatgcttcctggttacagcacagcaagaattcccctcccgaattt**A**aatgag

Type Ib-2 agtgctgaaaatgactttagcagtgatagcccaga**M**agaaaaatgcttcctggttacagcacagcaagaattcccctcccgaattt**A**aatgag

(1887) (1908) (1923)

Type Ia gacctaacctgtggaaatct**A**ctgatgtgggaggctgtaac**T**gtacaaacagaggt**T**attggaataactagcatgcttaaccttcatgcagg

Type Ib-1 gacctaacctgtggaaatct**A**ctgatgtgggaggctgtaac**T**gtacaaacagaggt**C**attggaataactagcatgcttaaccttcatgcagg

Type Ib-2 gacctaacctgtggaaatct**A**ctgatgtgggaggctgtaac**A**gtacaaacagaggt**C**attggaataactagcatgcttaaccttcatgcagg

M=A or
